# Supplementary material for: A sensitive SERS-based assay technique for accurate detection of foodborne pathogens without interference
Source: Royal Society of Chemistry journal article supplement (doi:10.1039/d4ay01555j), 2024-01-01
Supplement: d4ay01555j1.pdf [file d4ay01555j1.pdf]

## Supporting information

### A sensitive SERS-based assay technique for accurate detection of foodborne pathogens without interference

Xiangru Bai,<sup>\*a</sup> Wei Luo,<sup>a</sup> Wenyu Zhou,<sup>a</sup> Wei Chen,<sup>a</sup> Xinling Guo,<sup>a</sup> Aiguo Shen,<sup>b</sup>  
Jiming Hu<sup>b</sup>

<sup>a</sup> School of Pharmacy, Xinyang Agriculture and Forestry University, Xinyang 464007, P.R. China.

<sup>b</sup> College of Chemistry and Molecular Sciences, Wuhan University, Wuhan 430072, P.R. China

\*To whom correspondence should be addressed.

Dr. X. R. Bai, E-mail: baimaster@126.com.

#### List of contents

1. **Fig. S1.** Figure of color change before and after in suit reduction of  $\text{Ag}^+$  onto the surface of *E.coli*.
2. **Fig. S2.** The speciality of the functional Au NPs to  $\text{Ag}^+$ .
3. **Fig. S3.** (A) Figure of color change of the functional Au NPs with different concentration of  $\text{Ag}^+$ , (B) UV-*vis* spectroscopy of the functional Au NPs with different concentration of  $\text{Ag}^+$ .
4. **Fig. S4.** SERS spectroscopy of the detection system with three different concentration of *E.coli* (50, 100, 500 cfu/mL).
5. **Fig. S5.** (A) Effect of the amount of MBN, (B) effect of the concentration of the buffer solution, (C) effect of the pH of the buffer solution, (D) effect of the reaction time.
6. **Tab. S1.** Comparison of linear range and LOD with the other existing SERS based methods
7. **Fig. S6** Stability Of functional Au NPs over a period of six months.

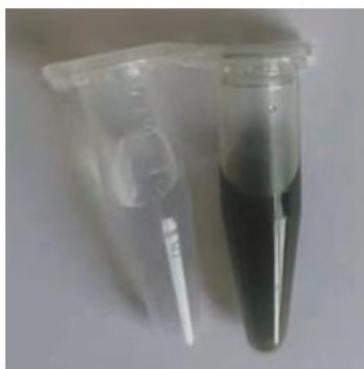

**Fig. S1.** Figure of color change before and after in suit reduction of  $\text{Ag}^+$  onto the surface of *E.coli*.

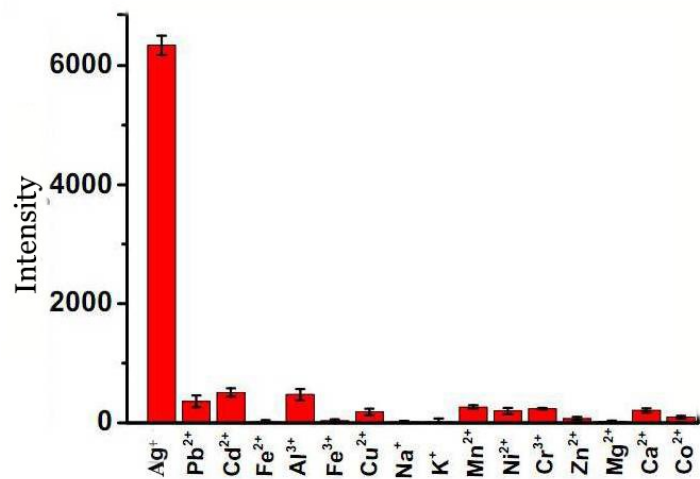

**Fig. S2.** The specificity of the functional Au NPs to Ag<sup>+</sup>.

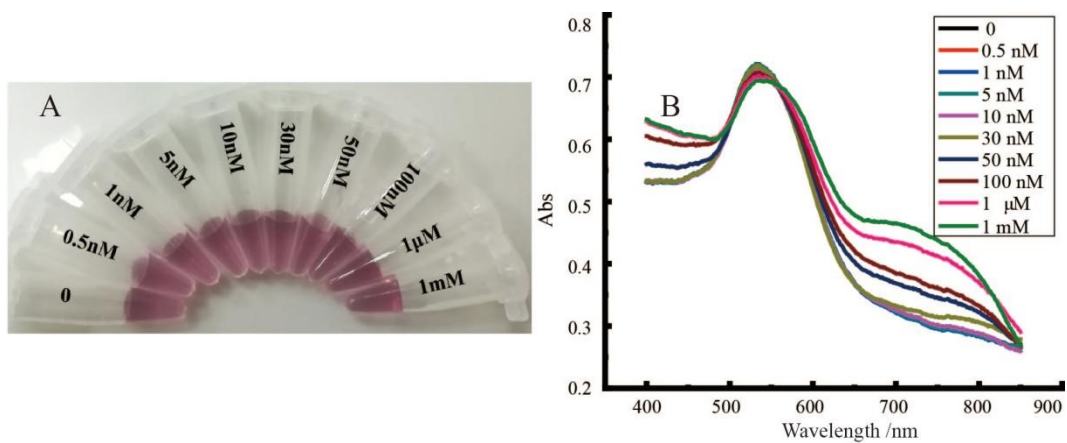

**Fig. S3.** (A) Figure of color change of the functional Au NPs with different concentration of  $\text{Ag}^+$ , (B) UV-*vis* spectroscopy of the functional Au NPs with different concentration of  $\text{Ag}^+$ .

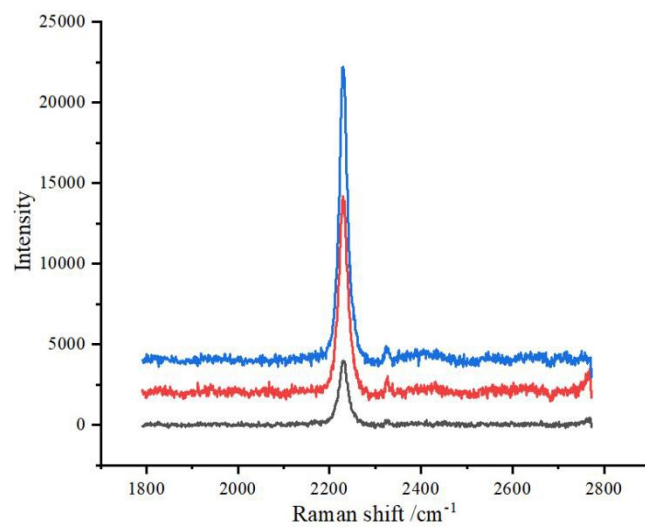

**Fig. S4.** SERS spectroscopy of the detection system with three different concentration of *E.coli* (50, 100, 500 cfu/mL).

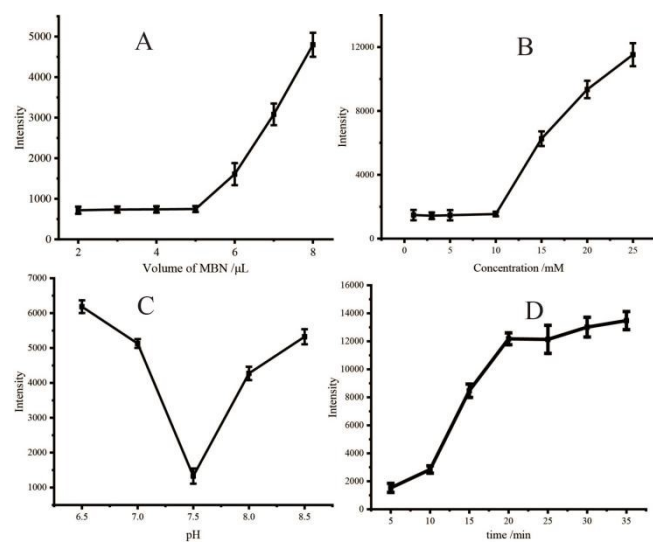

**Fig. S5.** (A) Effect of the amount of MBN, (B) effect of the concentration of the buffer solution, (C) effect of the pH of the buffer solution, (D) effect of the reaction time.

**Table S1.** Comparison of linear range and LOD with the other existing SERS based methods.

| Bacteria             | Linear range (cfu/mL)            | LOD (cfu/mL) | Reference                            |
|----------------------|----------------------------------|--------------|--------------------------------------|
| <i>E.coli</i>        | 100-700                          | 5            | Chen et al., 2024 <sup>[1]</sup>     |
| <i>E.coli</i>        | 10-10 <sup>4</sup>               | 10           | Zhou et al., 2020 <sup>[2]</sup>     |
| <i>E.coli</i>        | 20-10 <sup>5</sup>               | 50           | Zhang et al., 2018 <sup>[3]</sup>    |
| <i>E.coli</i>        | 50-10 <sup>4</sup>               | 100          | Hongdeok et al., 2016 <sup>[4]</sup> |
| <i>S. typhimuriu</i> | 10 <sup>2</sup> -10 <sup>6</sup> | 100          | Zheng et al., 2021 <sup>[5]</sup>    |
| <i>E.coli</i>        | 10-5×10 <sup>4</sup>             | 10           | This work                            |

1. Z. Chen, L. Yu, Z. Zhang, L. Su and Y. Xiong, *ACS Food Sci. Technol.*, 2024, **4**, 373.
2. S. Zhou, C. Lu, Y. Li, L. Xue, C. Zhao, G. Tian, Y. Bao, L. Tang, J. Lin and J. Zheng, *ACS Sensors*, 2020, **5**, 588.
3. S. Zheng, J. Xiao, J. Zhang, Q. Sun, D. Liu, Y. Liu and X. Gao, *Biosens Bioelectron.*, 2024, **247**, 115913.
4. C. Y. Zhang, C. W. Wang, R. Xiao, L. Tang, J. Huang, D. Wu, S. W. Liu, Y. Wang, D. Zhang, S. Q. Wang and X. M. Chen, *J. Mater. Chem. B.*, 2018, **6**, 3751.
5. J. Hongdeok, H. E. Young, K. Yongshin, C. Jaebum, J. Jihoon and L. D. Woo, *J. biomed. Lnanotechnol.*, 2016, **12**, 1938.

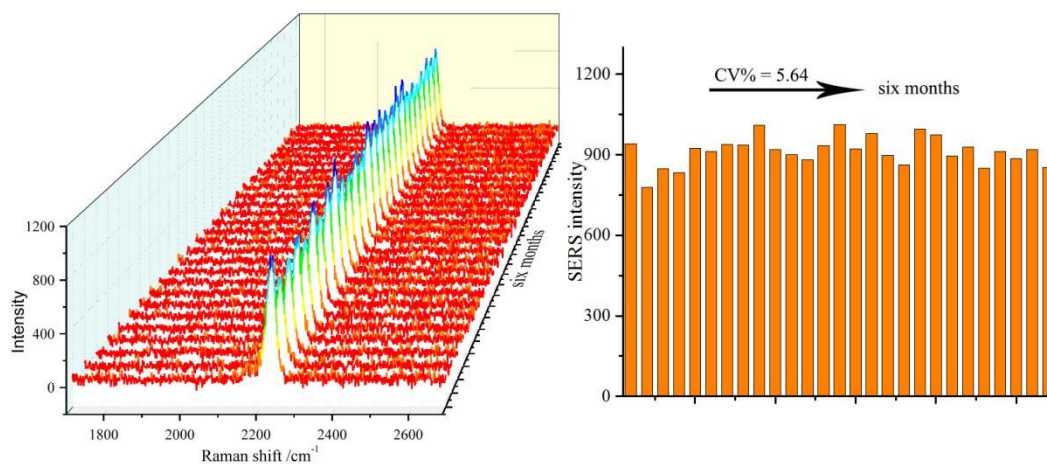

**Fig. S6.** Stability of functional Au NPs over a period of six months.
